# Supplementary material for: The prognostic value of a seven-microRNA classifier as a novel biomarker for the prediction and detection of recurrence in glioma patients
Source: PubMed Central journal article supplement (PMC5288195; doi:10.18632/oncotarget.10534), 2016-07-11
Supplement: oncotarget-07-53392-s001.pdf [file oncotarget-07-53392-s001.pdf]

## The prognostic value of a seven-microRNA classifier as a novel biomarker for the prediction and detection of recurrence in glioma patients

### SUPPLEMENTARY TABLES

**Supplementary Table S1: MiRNAs differentially expressed in GBM tissues compared with non-cancerous glial tissues in the training set, validation set and independent set.** The data were derived from 89, 102 and 109 GBM patients from TCGA database and 10 controls.

See Supplementary Table 1

**Supplementary Table S2: MiRNAs differentially expressed in GBM tissues compared with non-cancerous glial tissues in the training set, validation set and independent set.** The data were derived from 89, 102 and 109 GBM patients from TCGA database and 10 controls.

See Supplementary Table 2

**Supplementary Table S3: MiRNAs differentially expressed in GBM tissues compared with non-cancerous glial tissues in the training set, validation set and independent set.** The data were derived from 89, 102 and 109 GBM patients from TCGA database and 10 controls.

See Supplementary Table 3
